# Supplementary material for: Role of HIV-1 RNA and protein determinants for the selective packaging of spliced and unspliced viral RNA and host U6 and 7SL RNA in virus particles
Source: PubMed Central journal article supplement — Nucleic Acids Res. 2011 Jul 26;39(20):8915–27. doi: 10.1093/nar/gkr577 (PMC3203606; doi:10.1093/nar/gkr577), 2011-07-26
Supplement: supp_gkr577_revisedSuppl_Fig1.pdf [file supp_gkr577_revisedSuppl_Fig1.pdf]

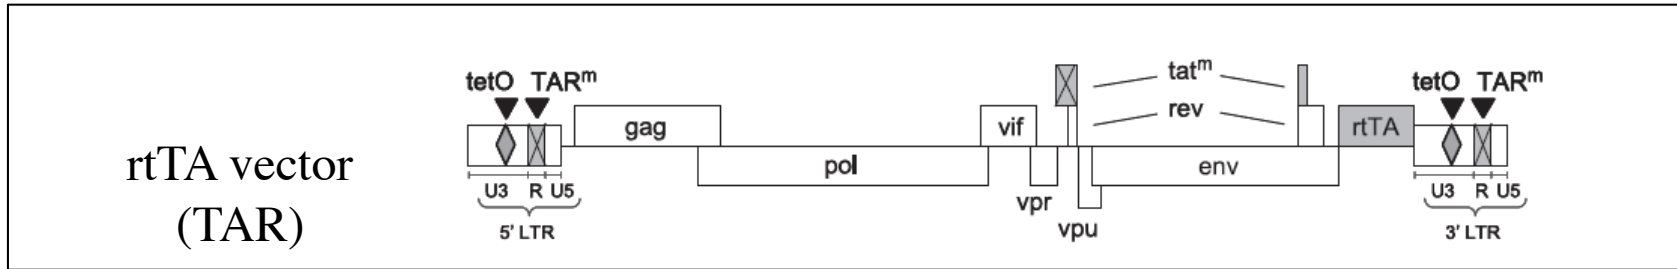

**Supplemental Fig. 1:** Map of the rtTA construct allowing TAT-independent expression of HIV-1. Transcription and replication of the virus were made dox dependent by the introduction of tetO elements in the U3 promoter region and by replacing the Nef gene with the rtTA gene. For more details see (11).
