# Supplementary material for: Role of HIV-1 RNA and protein determinants for the selective packaging of spliced and unspliced viral RNA and host U6 and 7SL RNA in virus particles
Source: PubMed Central journal article supplement — Nucleic Acids Res. 2011 Jul 26;39(20):8915–27. doi: 10.1093/nar/gkr577 (PMC3203606; doi:10.1093/nar/gkr577), 2011-07-26
Supplement: supp_gkr577_revisedSuppl_Fig2.pdf [file supp_gkr577_revisedSuppl_Fig2.pdf]

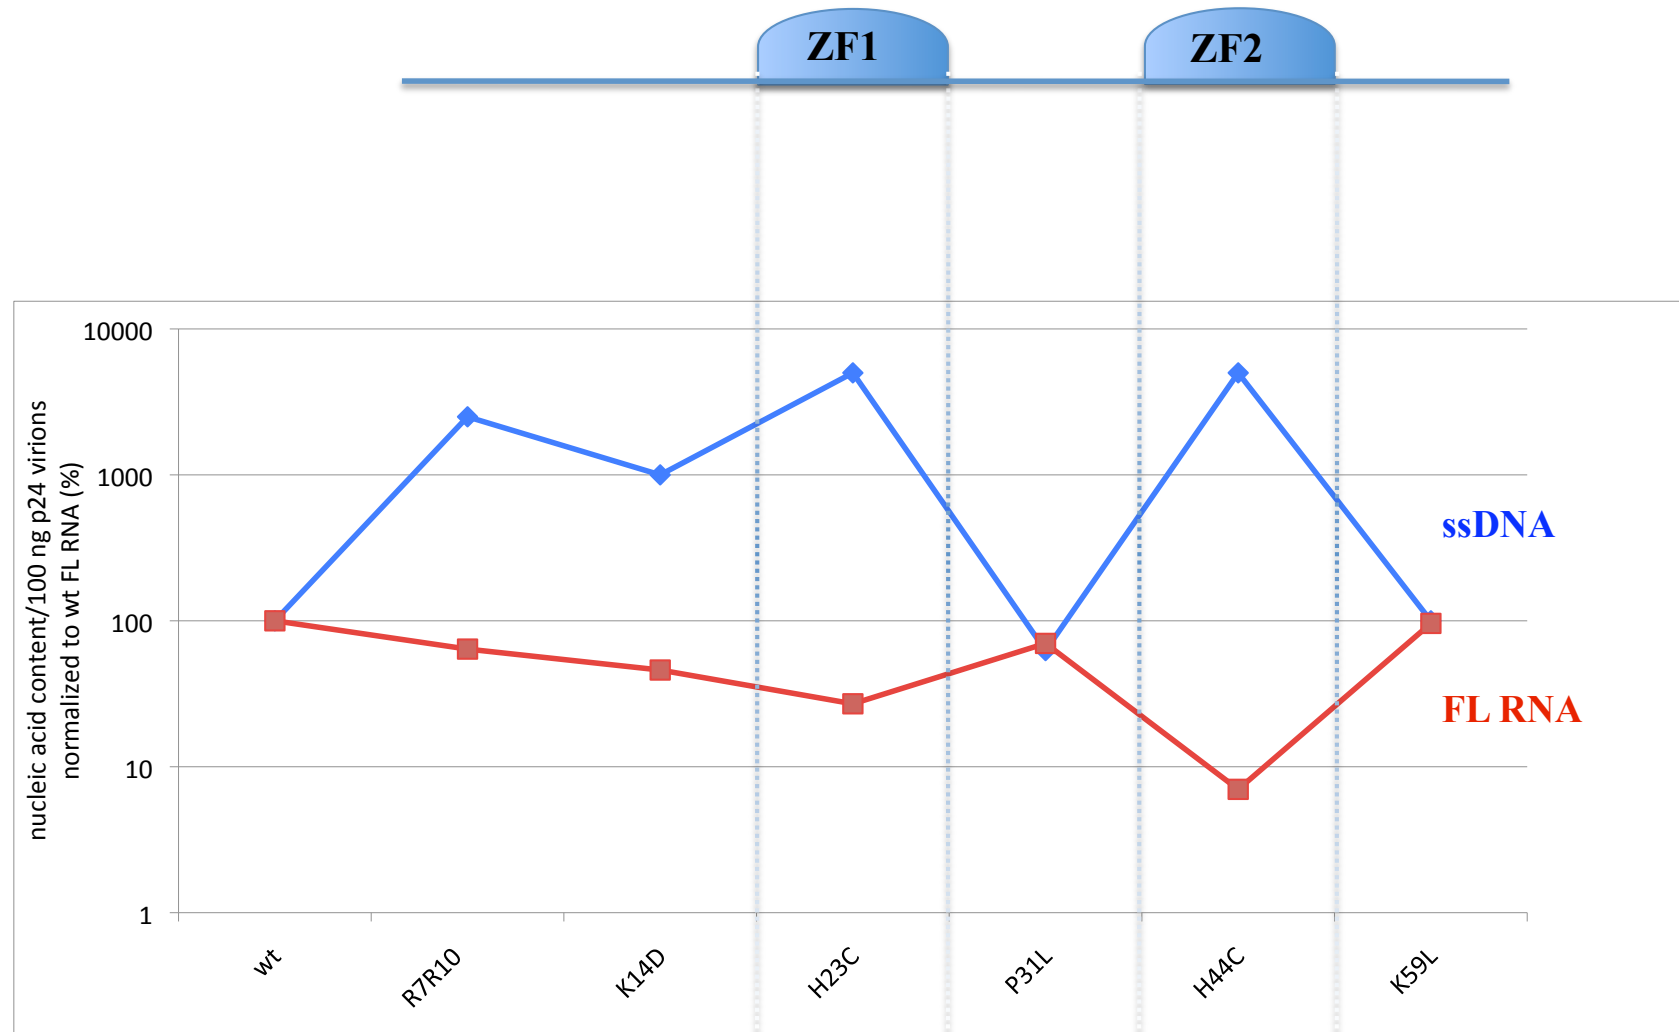

**Supplemental Figure 2:** Effects of GagNC mutations on the nature of the nucleic acid (RNA versus DNA) packaged in virions. The levels of FL RNAs (cps/100 ng p24) are expressed as % of wt, as in Fig.3 and plotted in curve. The DNA content (cps of strong stop DNA/100 ng p24) of the mutant virions were previously determined (82) and are reported to the graph for comparison purpose. Except for P31L and K59L mutants, the DNA and RNA content of the GagNC mutants varied in an opposite manner.
